# Supplementary material for: The modulated oxygen evolution reaction performance of LaFeO3 with abundant electronic structures via a design of stoichiometry offset
Source: Royal Society of Chemistry journal article supplement (doi:10.1039/d2cp06015a), 2023-01-01
Supplement: d2cp06015a1.pdf [file d2cp06015a1.pdf]

**The modulated oxygen evolution reaction performance of LaFeO<sub>3</sub>  
with abundant electronic structures via a design of stoichiometry  
offset**

Yuan Zhang<sup>a</sup>, Hang Xu<sup>a,b</sup>, Mei Liu<sup>\*,a</sup>, Ji Qi<sup>a,b</sup>, Linglong Hu<sup>a,c</sup>, Ming  
Feng<sup>\*,a</sup> and Weiming Lü<sup>\*,b</sup>

*<sup>a</sup>Key Laboratory of Functional Materials Physics and Chemistry of the Ministry of  
Education, Jilin Normal University, Changchun 130103, China*

*<sup>b</sup>Functional Materials and Acousto-Optic Instruments Institute, School of  
Instrumentation Science and Engineering, Harbin 150080, China*

*<sup>c</sup>Jilin Key Laboratory of Solid Laser Technology and Application, College of Science,  
Changchun University of Science and Technology, Changchun 130022, China*

\*Corresponding author.

E-mail addresses: liumei@jlnu.edu.cn (M. Liu), mingfeng@jlnu.edu.cn (M. Feng)  
and weiminglv@hit.edu.cn (W. M. Lü)

## Results and discussion

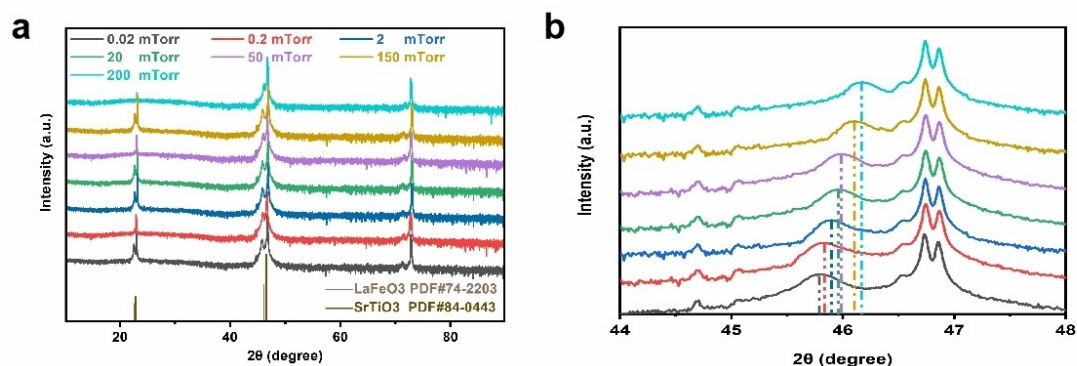

Fig. S1. The XRD of all samples fabricated under different oxygen atmospheres.

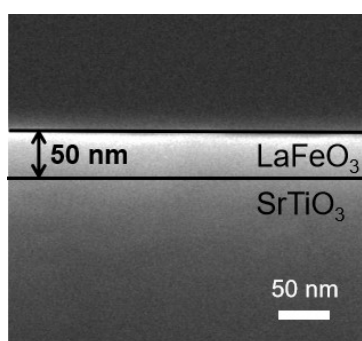

Fig. S2. SEM scanning image of LFO

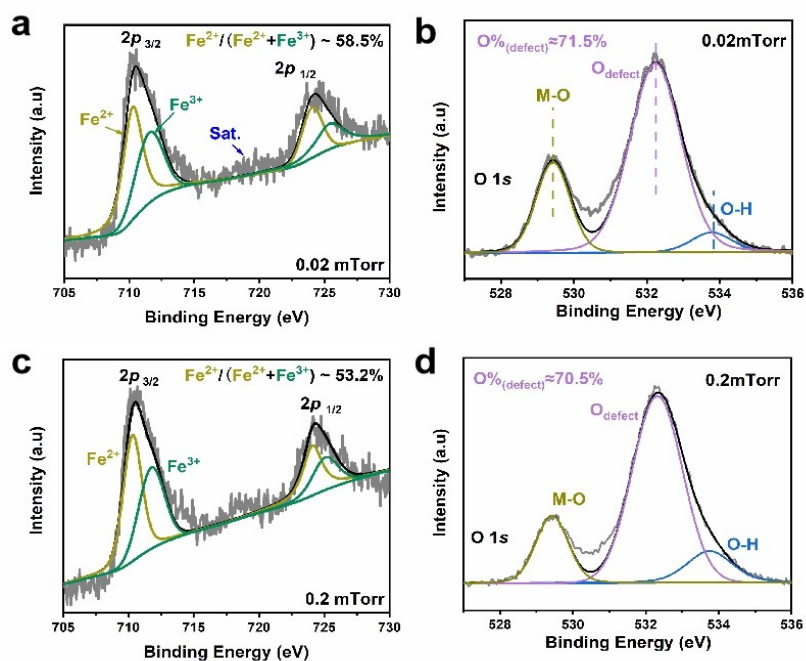

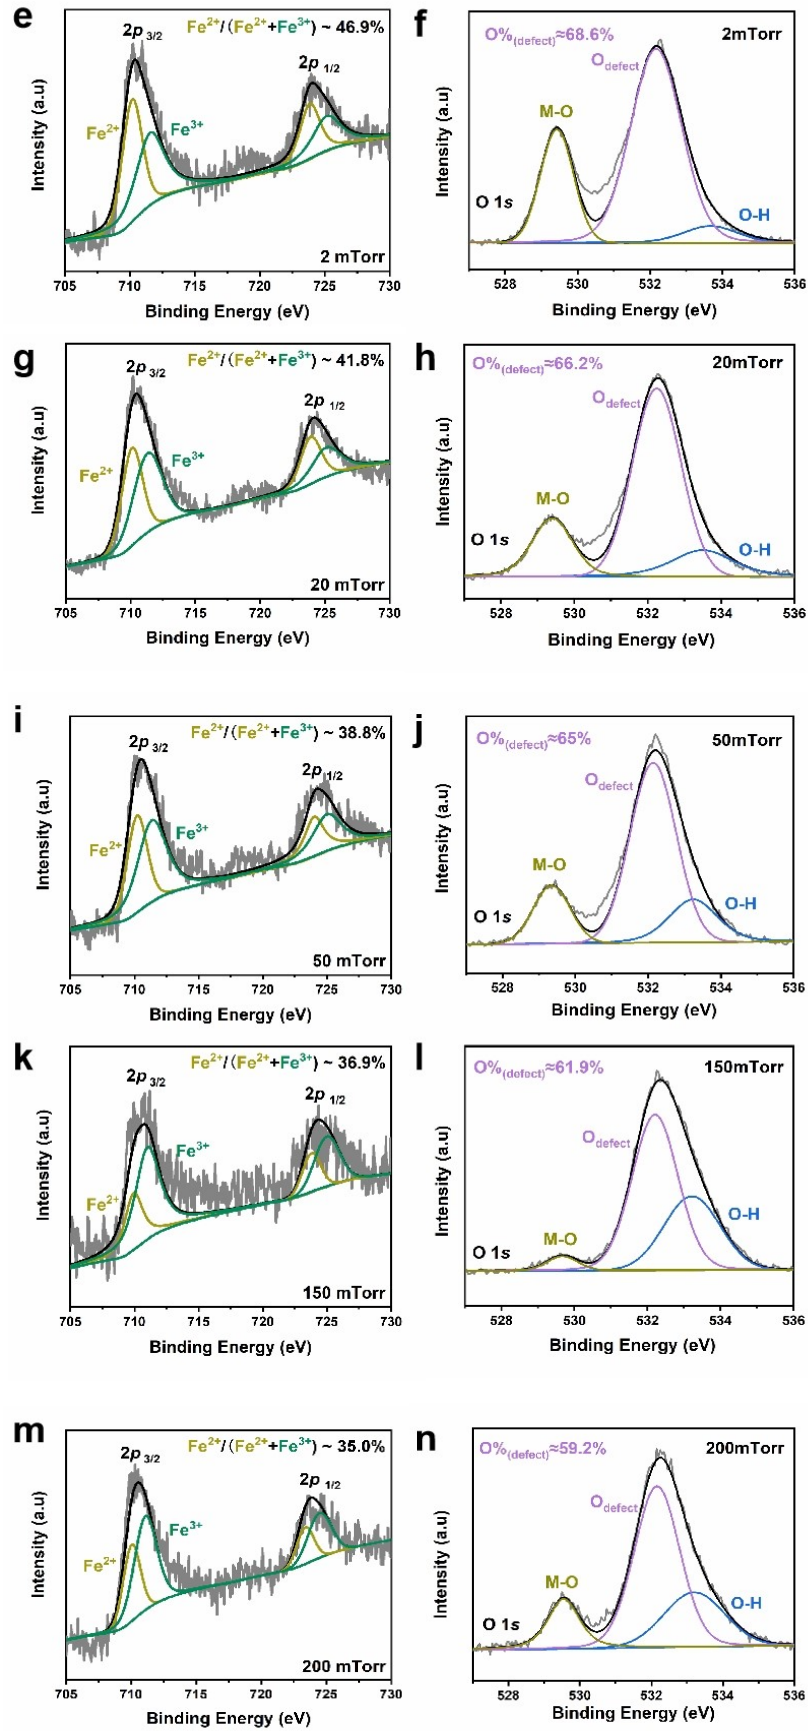

Fig. S3. The high-res Fe and O scans

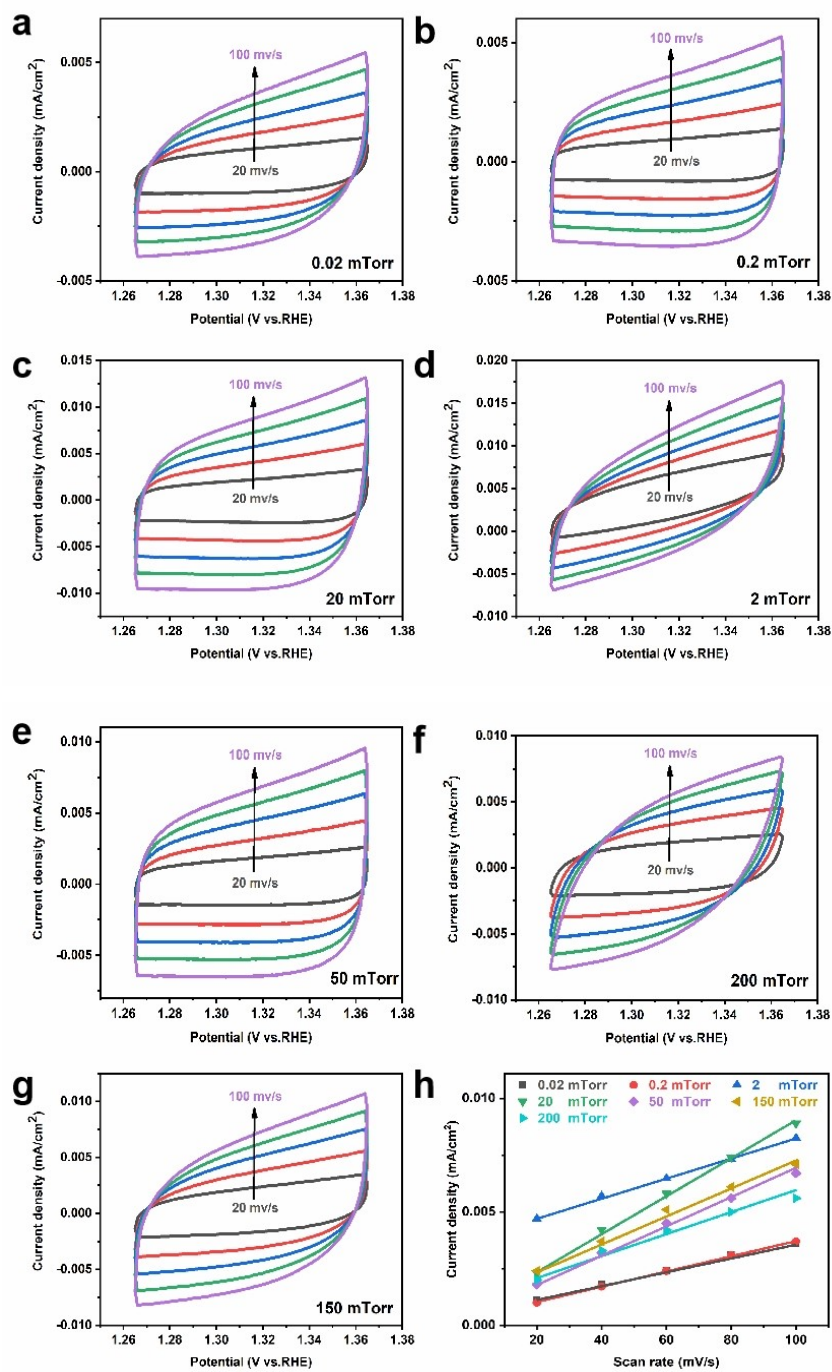

Fig. S4. The CVs for all samples and their double layer charging capacitance

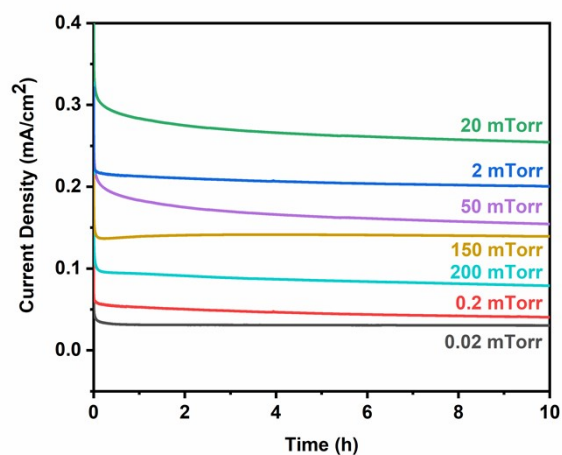

Fig. S5. Chronoamperometric response of LFO films under different oxygen pressures at the potential of 0.8 V vs. RHE

|      | $2p_{3/2}$    |                            |                           |               |                            |                           | $2p_{1/2}$    |                            |                           |               |                            |                           |
|------|---------------|----------------------------|---------------------------|---------------|----------------------------|---------------------------|---------------|----------------------------|---------------------------|---------------|----------------------------|---------------------------|
|      | $Fe^{2+}$     |                            |                           | $Fe^{3+}$     |                            |                           | $Fe^{2+}$     |                            |                           | $Fe^{3+}$     |                            |                           |
|      | peak position | full-width at half-maximum | intensity of fitted peaks | peak position | full-width at half-maximum | intensity of fitted peaks | peak position | full-width at half-maximum | intensity of fitted peaks | peak position | full-width at half-maximum | intensity of fitted peaks |
| 0.02 | 710.26        | 1.8                        | 13844.2                   | 711.54        | 2.5                        | 13206.0                   | 724.05        | 1.8                        | 13789.6                   | 725.4         | 2.5                        | 13454.2                   |
| 0.2  | 710.3         | 1.7                        | 12496.9                   | 711.75        | 2.3                        | 11790.3                   | 724.1         | 1.7                        | 12207.8                   | 725.08        | 2.3                        | 11950.9                   |
| 2    | 710.17        | 1.85                       | 10914.9                   | 711.55        | 2.65                       | 10198.1                   | 723.85        | 1.85                       | 10773.4                   | 725.15        | 2.65                       | 10582.3                   |
| 20   | 710.1         | 1.9                        | 19741.4                   | 711.3         | 2.65                       | 19488.0                   | 723.9         | 1.9                        | 20096.1                   | 725.1         | 2.65                       | 19792.0                   |
| 50   | 710.2         | 1.85                       | 8572.91                   | 711.35        | 2.7                        | 8474.39                   | 724.0         | 1.85                       | 8548.27                   | 725.0         | 2.7                        | 8597.53                   |
| 150  | 709.93        | 1.7                        | 1659.62                   | 711.01        | 2.3                        | 1881.75                   | 723.8         | 1.7                        | 1854.82                   | 725.0         | 2.3                        | 1942.32                   |
| 200  | 710.05        | 1.55                       | 7159.84                   | 711.1         | 2.05                       | 7179.8                    | 723.4         | 1.55                       | 7020.42                   | 724.5         | 2.05                       | 7259.43                   |

Table S1. The Table of fitting parameters of Fe

|      | M-O           |                            |                           | O <sub>defect</sub> |                            |                           | O-H           |                            |                           |
|------|---------------|----------------------------|---------------------------|---------------------|----------------------------|---------------------------|---------------|----------------------------|---------------------------|
|      | peak position | full-width at half-maximum | intensity of fitted peaks | peak position       | full-width at half-maximum | intensity of fitted peaks | peak position | full-width at half-maximum | intensity of fitted peaks |
| 0.02 | 529.43        | 1.1                        | 22080.3                   | 532.24              | 1.65                       | 36156.3                   | 533.78        | 1.32                       | 11667.9                   |
| 0.2  | 529.43        | 1.05                       | 20698.2                   | 532.32              | 1.62                       | 40847.7                   | 533.75        | 1.46                       | 14941.2                   |
| 2    | 529.43        | 1.08                       | 30763.7                   | 532.17              | 1.66                       | 45628.5                   | 533.67        | 1.75                       | 12925.9                   |
| 20   | 529.4         | 1.3                        | 17652.9                   | 532.25              | 1.56                       | 38021.8                   | 533.5         | 1.98                       | 12772.8                   |
| 50   | 529.35        | 1.2                        | 19375.7                   | 532.14              | 1.5                        | 39453.3                   | 533.24        | 1.56                       | 17068.0                   |
| 150  | 529.67        | 1                          | 9239.1                    | 532.21              | 1.48                       | 28075.4                   | 533.22        | 1.8                        | 16953.4                   |
| 200  | 529.55        | 1.04                       | 7145.2                    | 532.16              | 1.5                        | 14201.1                   | 533.2         | 2                          | 7485.2                    |

Table S2. The Table of fitting parameters of O

| Oxygen pressure     | 0.02 mTorr | 0.2 mTorr | 2 mTorr | 20 mTorr | 50 mTorr | 150 mTorr | 200 mTorr |
|---------------------|------------|-----------|---------|----------|----------|-----------|-----------|
| Fe <sup>2+</sup>    | 58.5%      | 53.2%     | 46.9%   | 41.8%    | 38.8%    | 36.9%     | 35.0%     |
| O <sub>defect</sub> | 71.5%      | 70.5%     | 68.6%   | 66.2%    | 65.0%    | 61.9%     | 59.2%     |

Table S3. The stoichiometric ratios of Fe<sup>2+</sup> and O<sub>defect</sub>

| Oxygen pressure  | 0.02 mTorr | 0.2 mTorr | 2 mTorr | 20 mTorr | 50 mTorr | 150 mTorr | 200 mTorr |
|------------------|------------|-----------|---------|----------|----------|-----------|-----------|
| capacitance (μF) | 4.5        | 5.1       | 7.7     | 8.2      | 6.4      | 6.1       | 5.9       |

Table S4. The capacitance values of all samples
